# Supplementary material for: Elevated complement mediator levels in endothelial-derived plasma exosomes implicate endothelial innate inflammation in diminished brain function of aging humans
Source: PubMed Central journal article supplement (PMC8355229; doi:10.1038/s41598-021-91759-2), 2021-08-10
Supplement: 41598_2021_91759_MOESM2_ESM.pdf [file 41598_2021_91759_MOESM2_ESM.pdf]

**Title:** Elevated complement mediator levels in endothelial-derived plasma exosomes implicate endothelial innate inflammation in diminished brain function of aging humans

**Authors:** Fanny M. Elahi<sup>1\*</sup>, Danielle Harvey<sup>2</sup>, Marie Altendahl<sup>1</sup>, Nivetha Brathaban<sup>1</sup>, Nicole Fernandes<sup>1</sup>, Kaitlin B. Casaletto<sup>1</sup>, Adam M. Staffaroni<sup>1</sup>, Pauline Maillard<sup>3</sup>, Jason D. Hinman<sup>4</sup>, Bruce L. Miller<sup>1</sup>, Charles DeCarli<sup>3</sup>, Joel H. Kramer<sup>1</sup>, Edward J. Goetzl<sup>5,6,7\*</sup>

<sup>1</sup>Memory and Aging Center, Department of Neurology, University of California, San Francisco. San Francisco, CA, USA

<sup>2</sup>Department of Public Health Sciences, University of California, Davis. Davis, CA, USA

<sup>3</sup>Department of Neurology and Center for Neuroscience, University of California, Davis. Davis, CA, USA

<sup>4</sup>Department of Neurology, University of California, Los Angeles. Los Angeles, CA, USA

<sup>5</sup>Department of Medicine, University of California, San Francisco. San Francisco, CA, USA

<sup>6</sup>Jewish Home of San Francisco. San Francisco, CA, USA

<sup>7</sup>Geriatric Research Center, 1719 Broderick St., San Francisco, CA, USA

**Keywords:** cerebral small vessel disease; exosomes; innate immunity; inflammation; complement factors; biomarkers; white matter; neurodegeneration.

\*Corresponding Authors:

Fanny M. Elahi, MD PhD

675 Nelson Rising Lane, Suite 190, San Francisco, CA, 94158

Emails: [fanny.elahi@ucsf.edu](mailto:fanny.elahi@ucsf.edu) and [elahilab15@gmail.com](mailto:elahilab15@gmail.com)

Edward J. Goetzl, MD

Geriatric Research Center, 1719 Broderick St., San Francisco, CA 94115

E-mail: [edward.goetzl@ucsf.edu](mailto:edward.goetzl@ucsf.edu)

Supplemental Figure 2 | Nanoparticle Tracking Assay

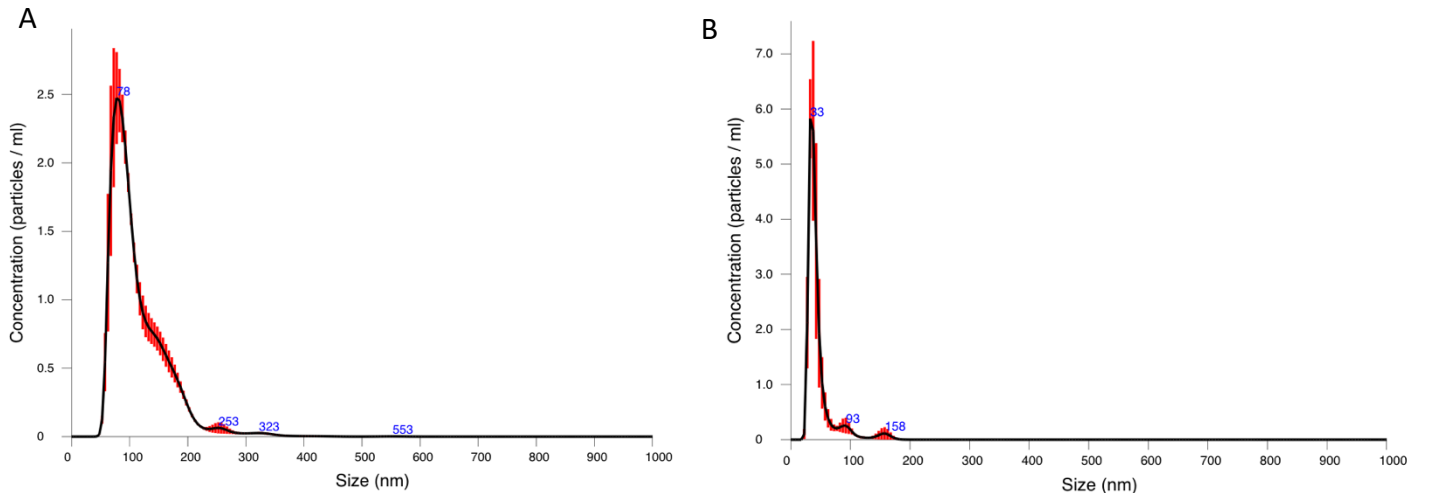

Results of NTA, without (A) and with (B) ExoGlow dye for typical EDE samples.
